# Supplementary figures and images for: Importance of incomplete lineage sorting and introgression in the origin of shared genetic variation between two closely related pines with overlapping distributions
Source: PubMed Central journal article supplement — Heredity (Edinb). 2016 Sep 21;118(3):211–20. doi: 10.1038/hdy.2016.72 (PMC5315522; doi:10.1038/hdy.2016.72), 2016-09-21

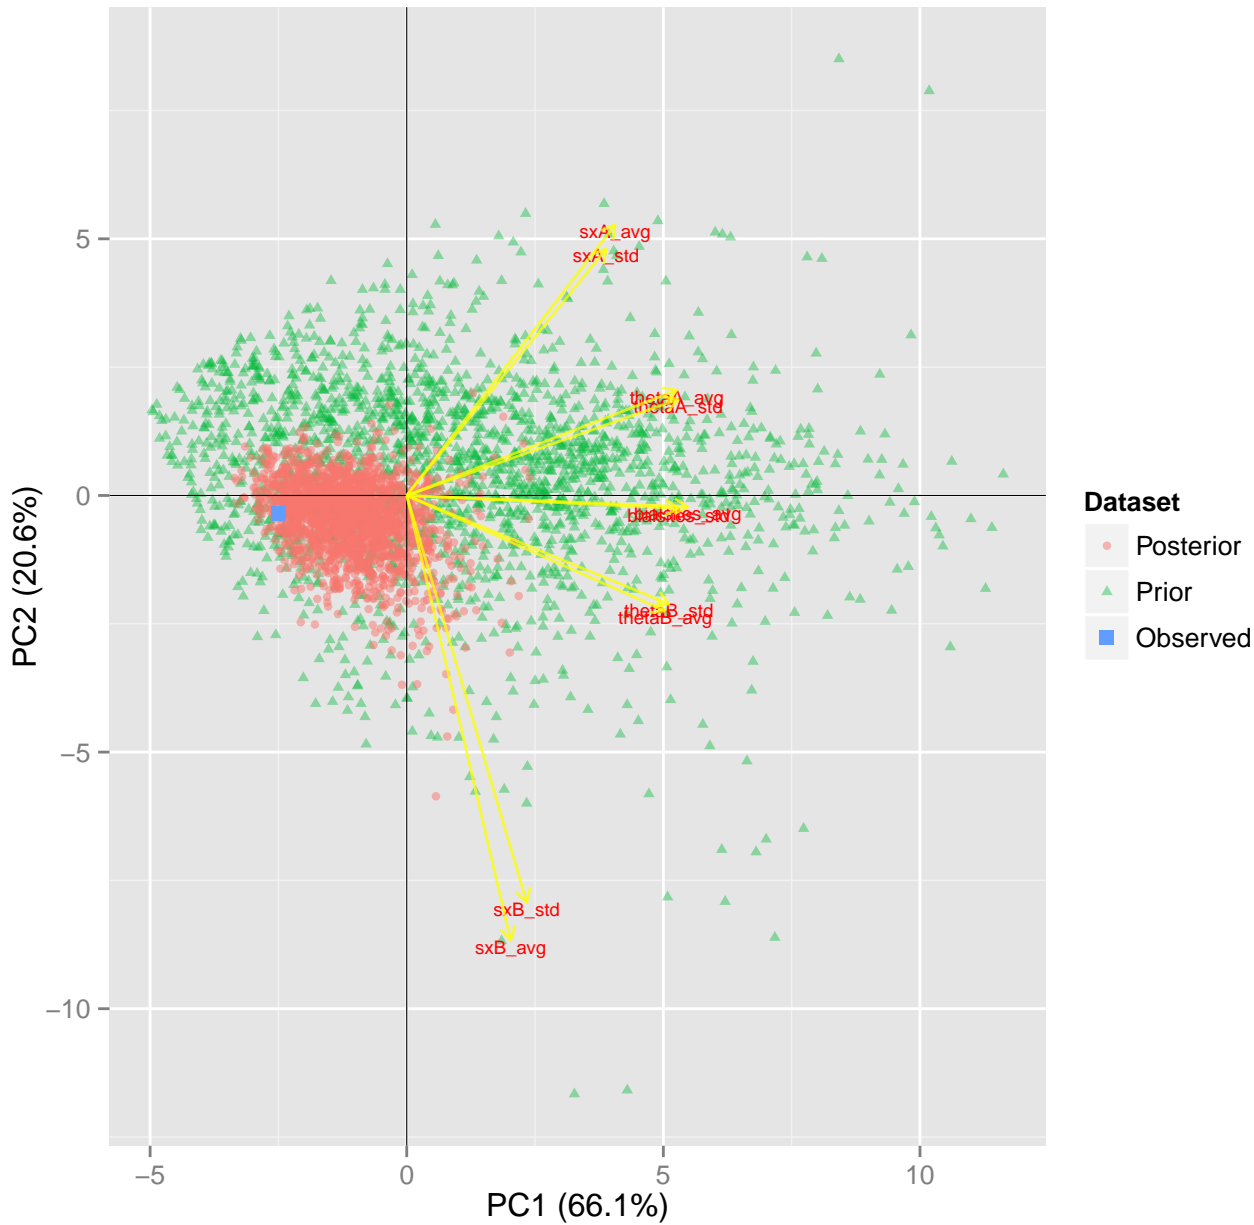

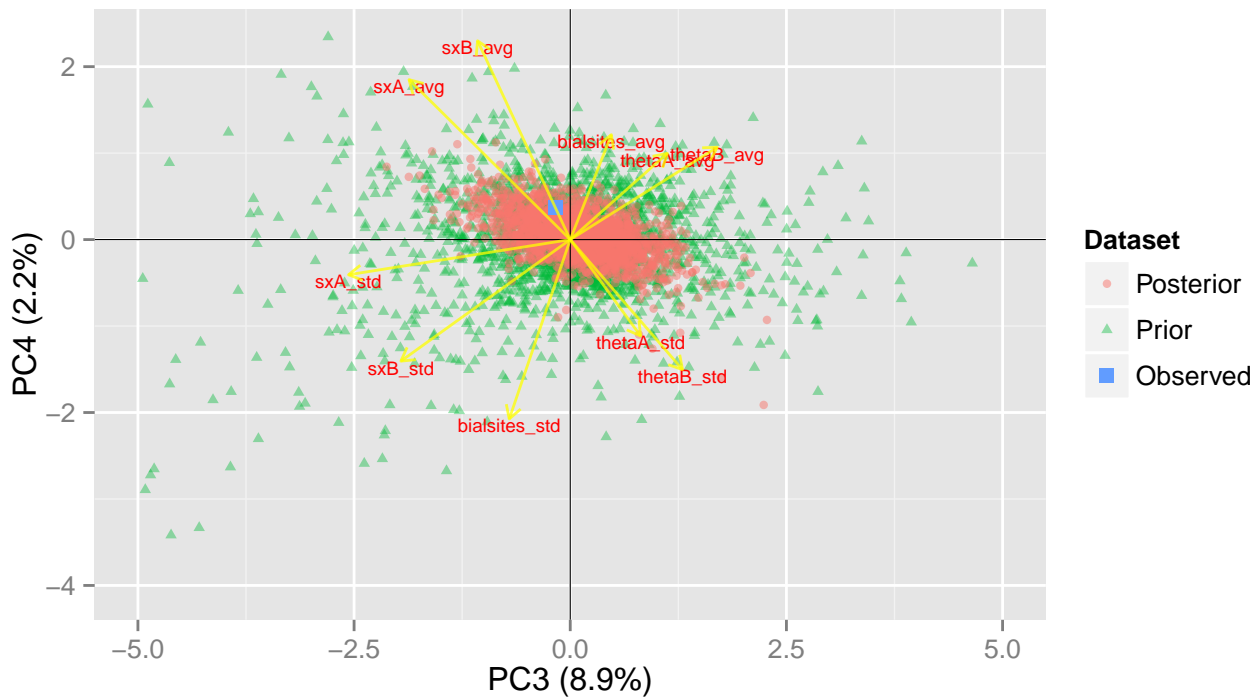

Supplement: hdy201672x3.pdf [file hdy201672x3.pdf]

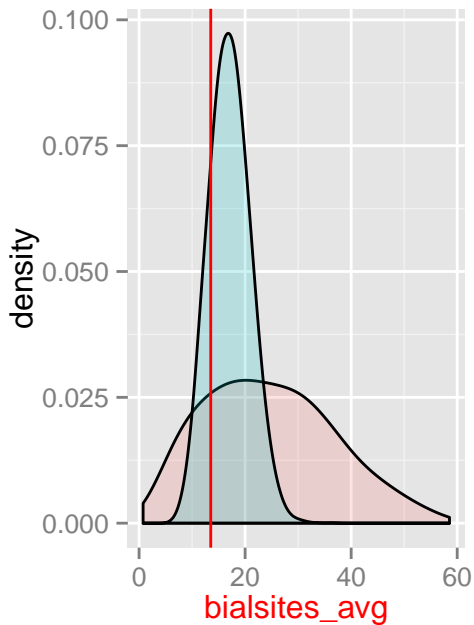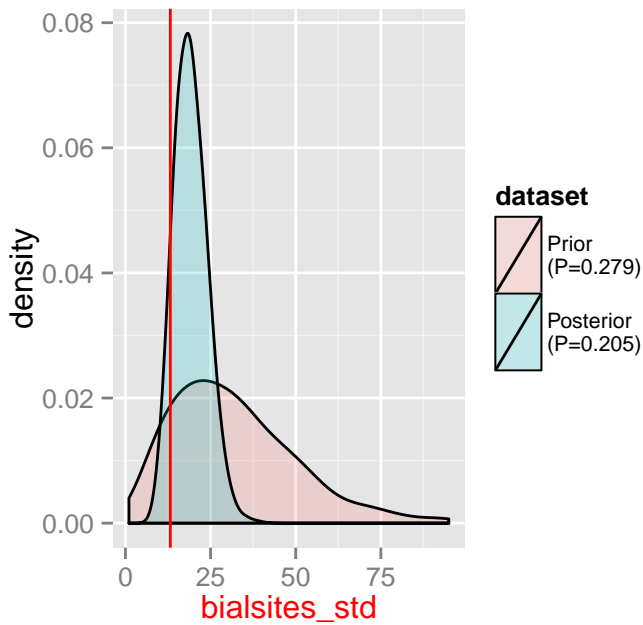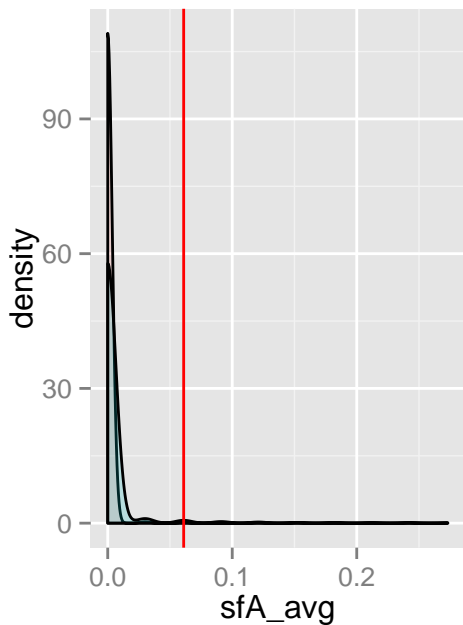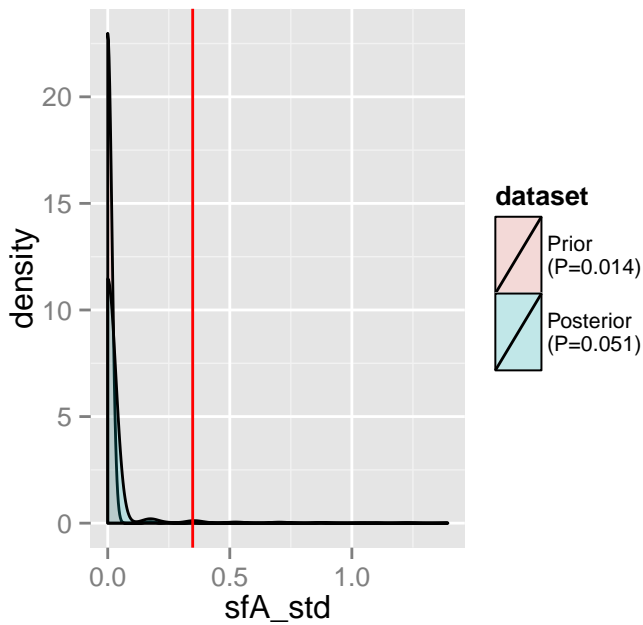

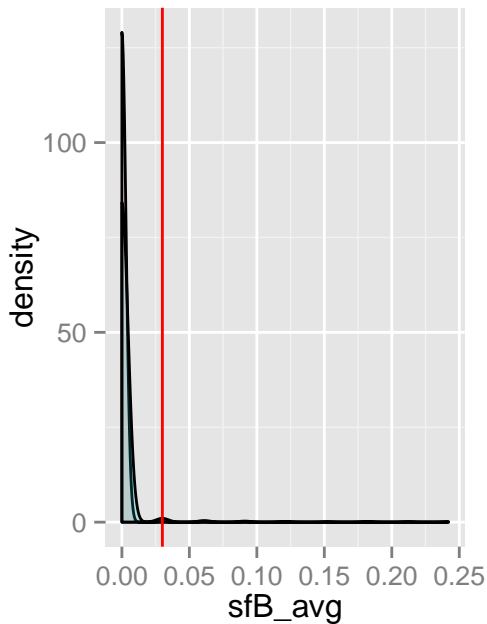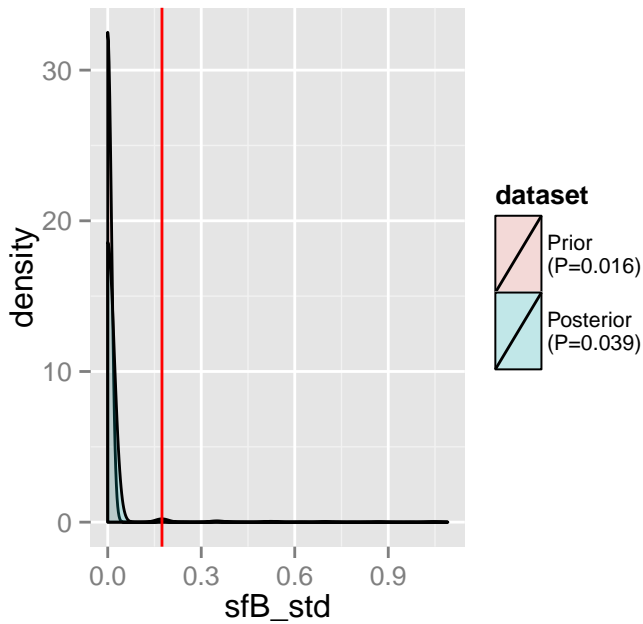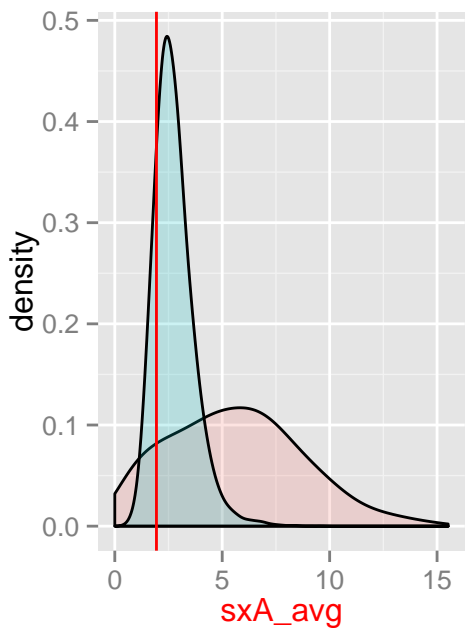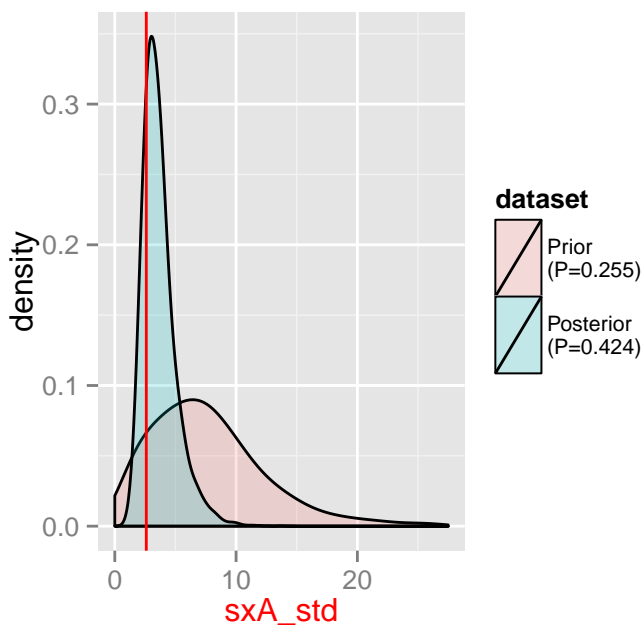

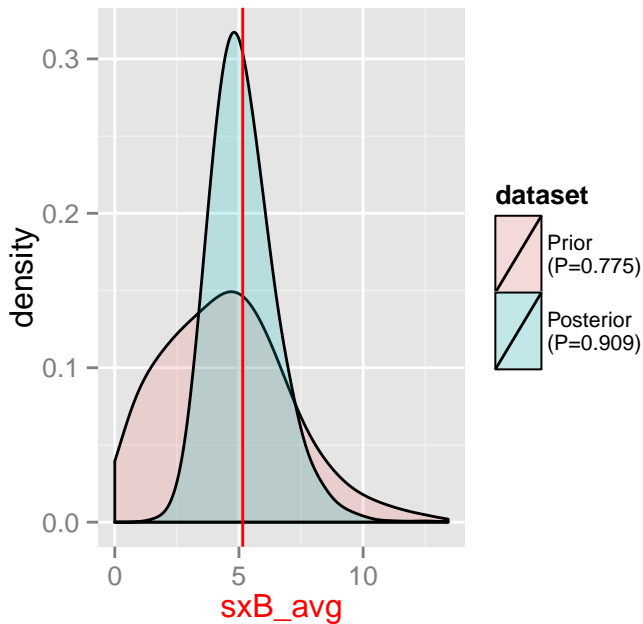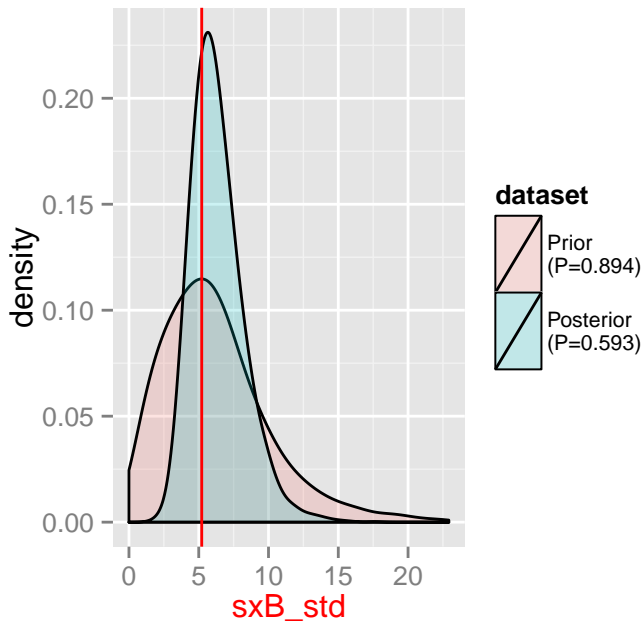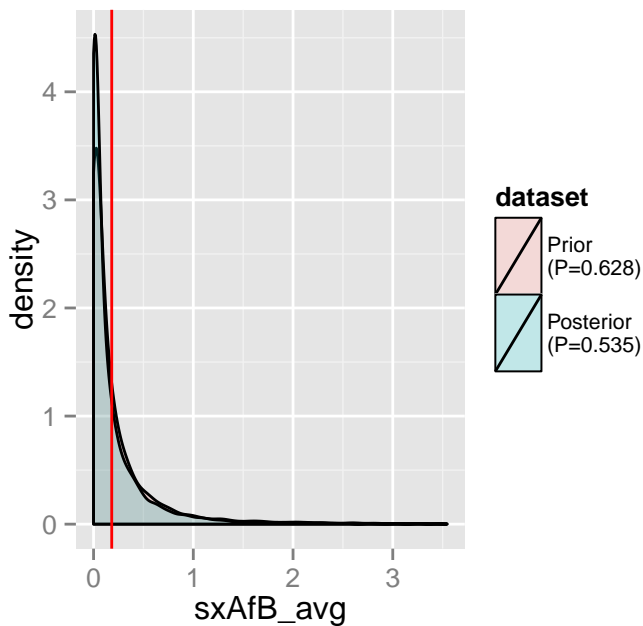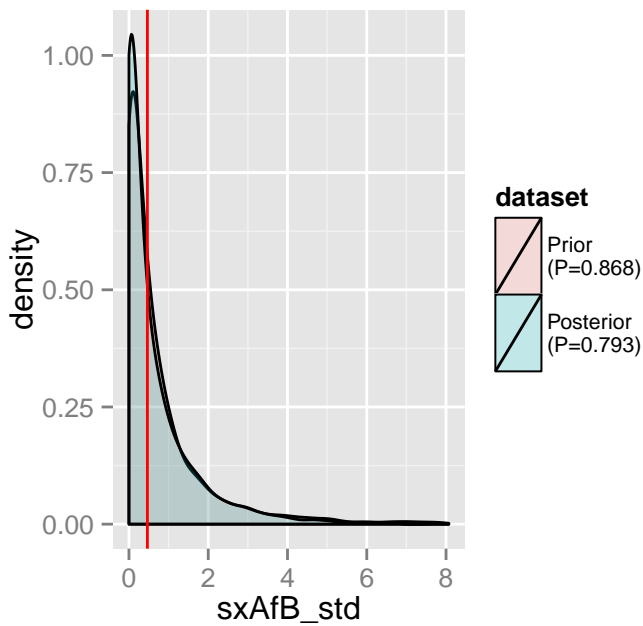

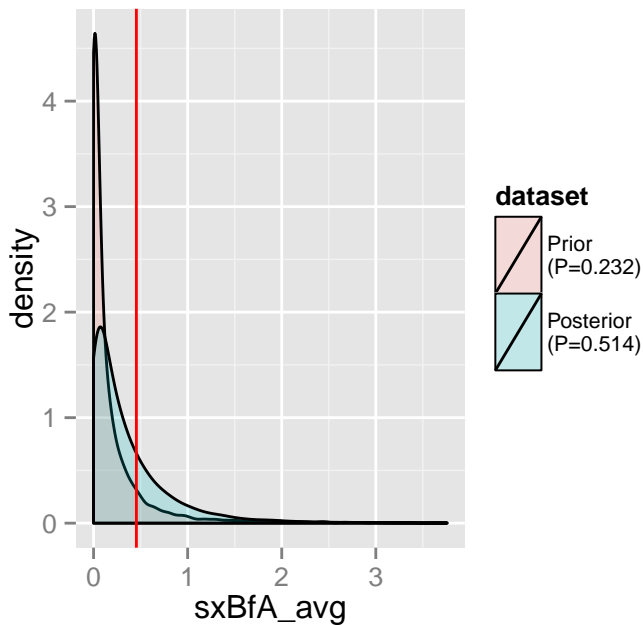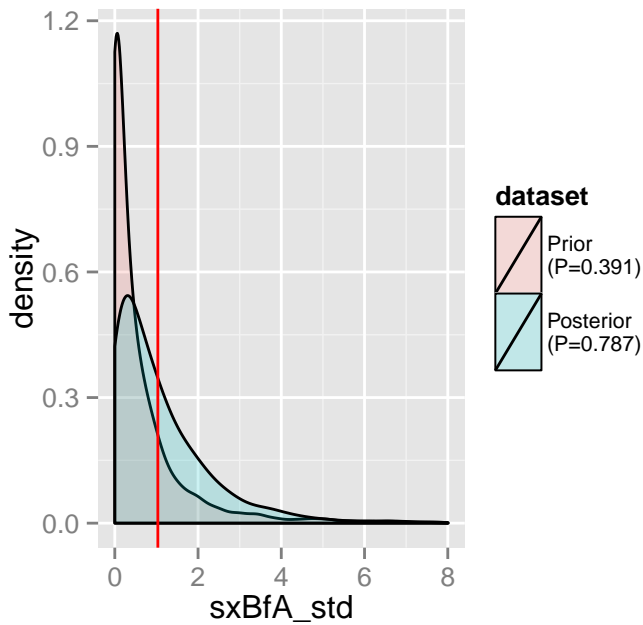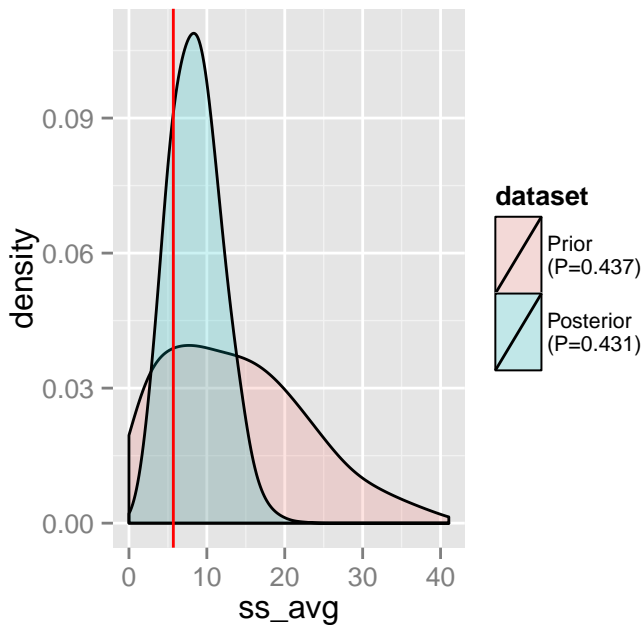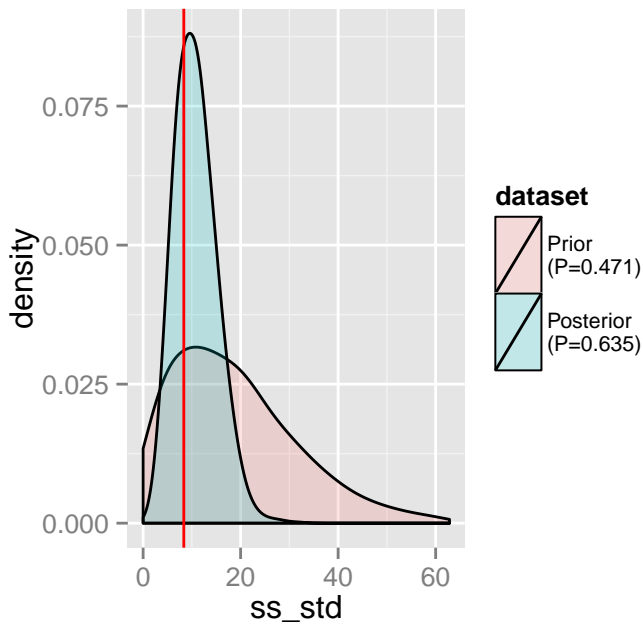

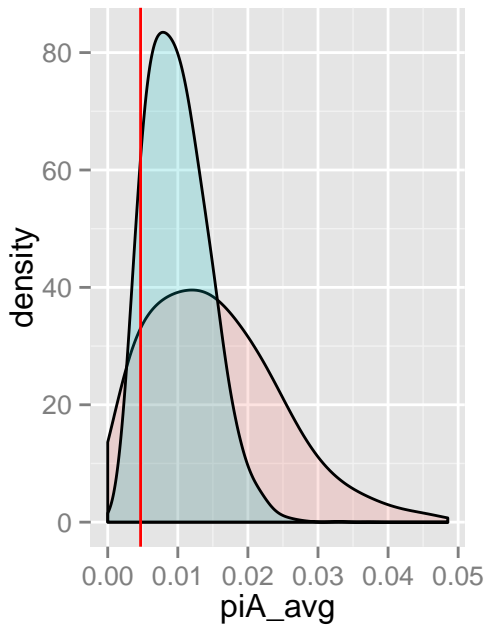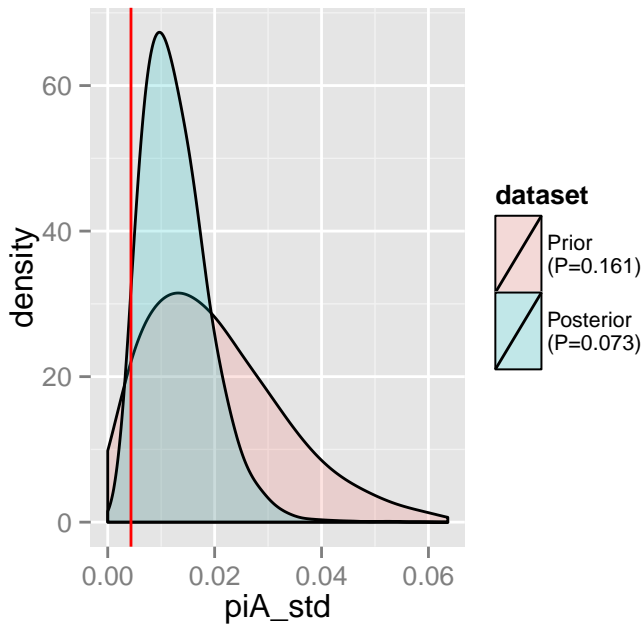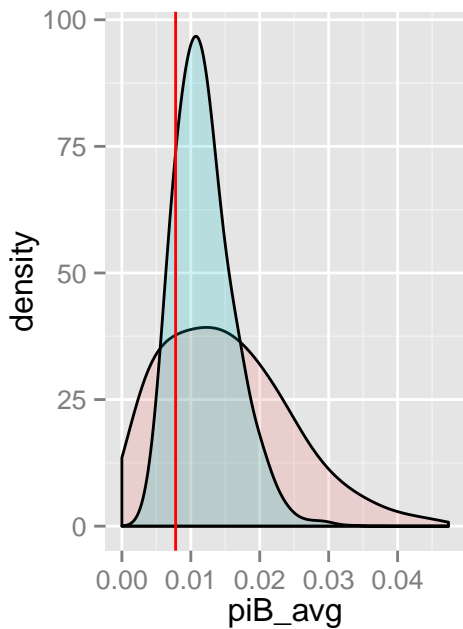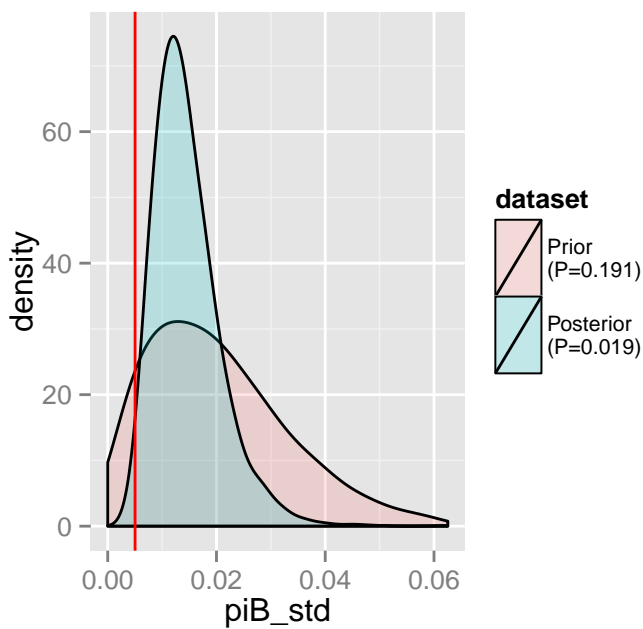

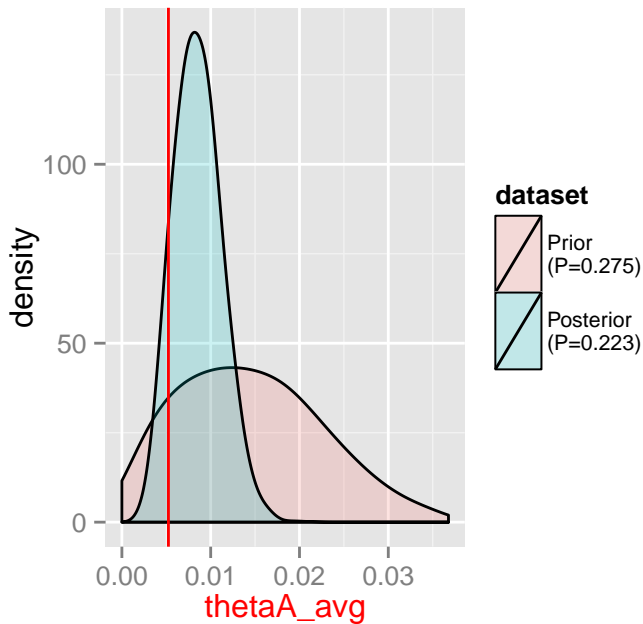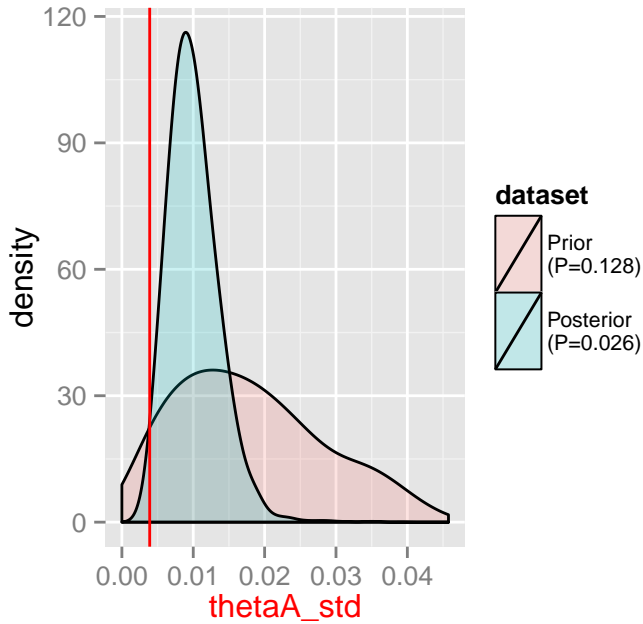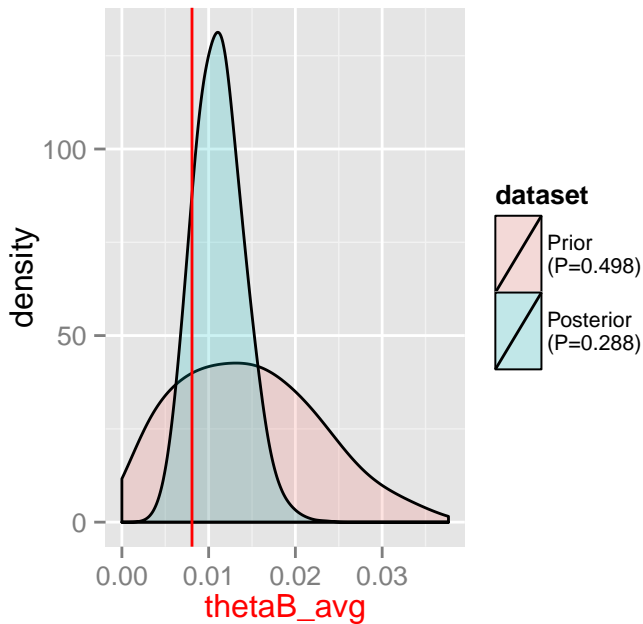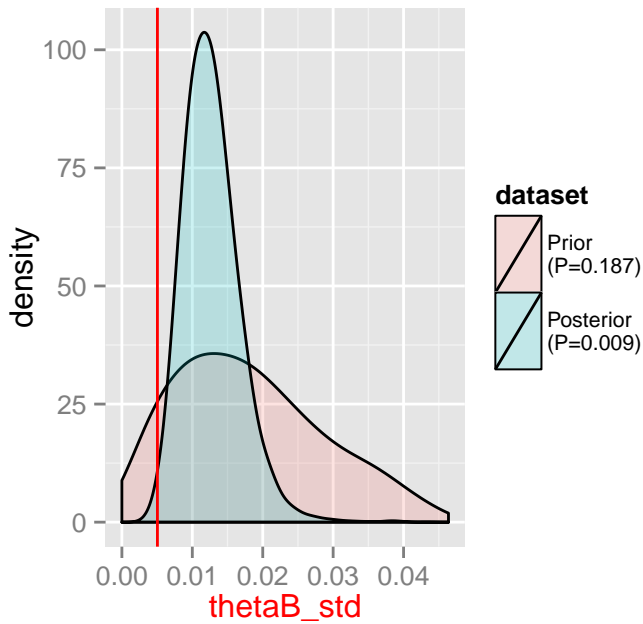

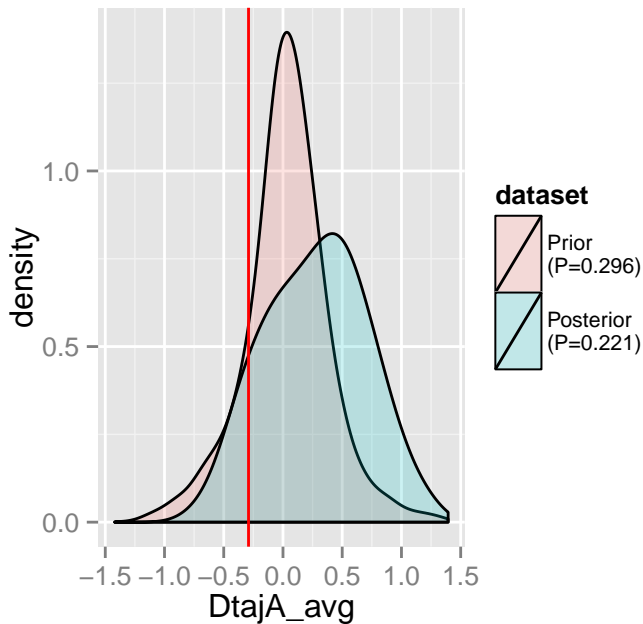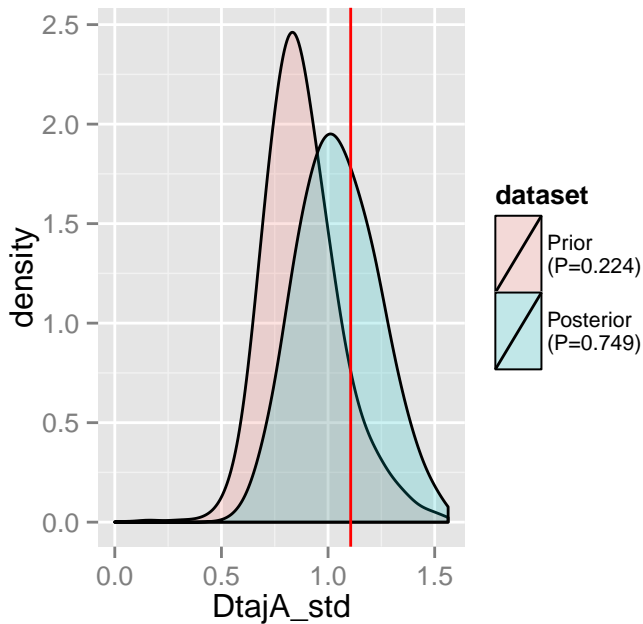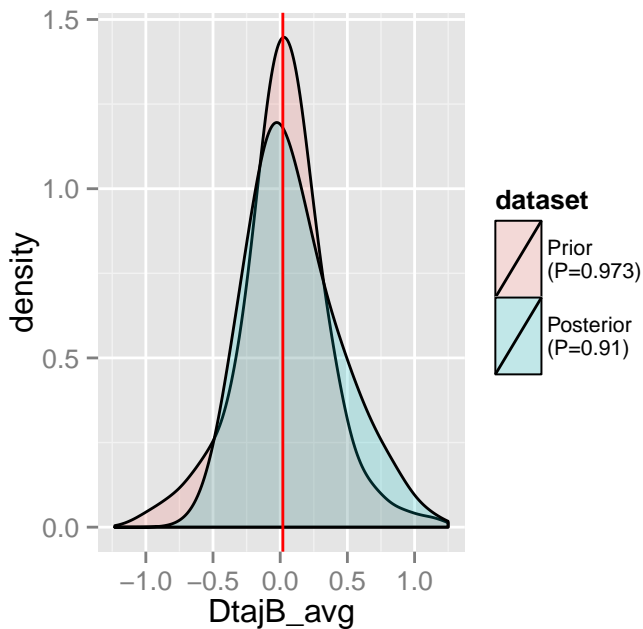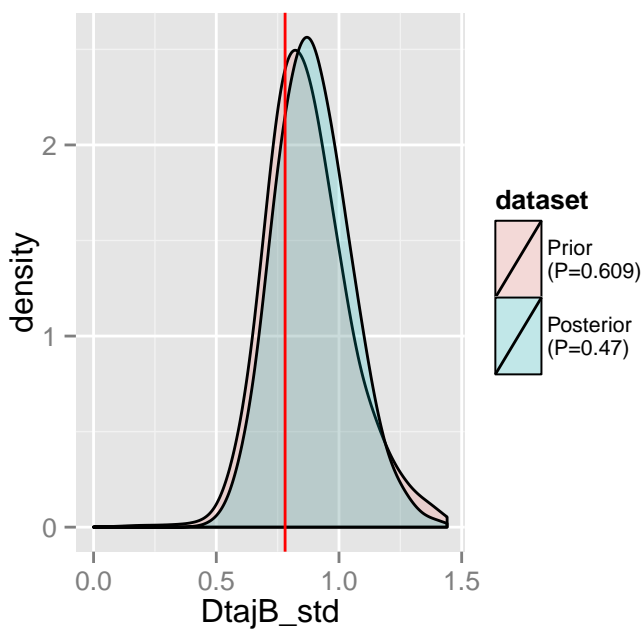

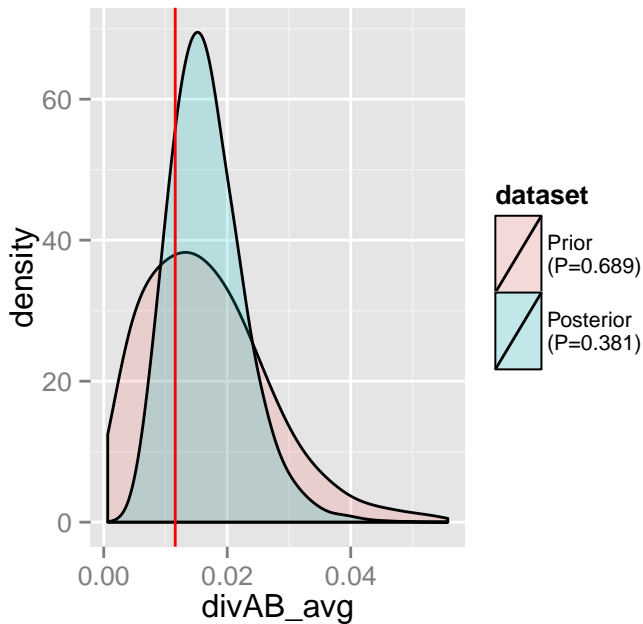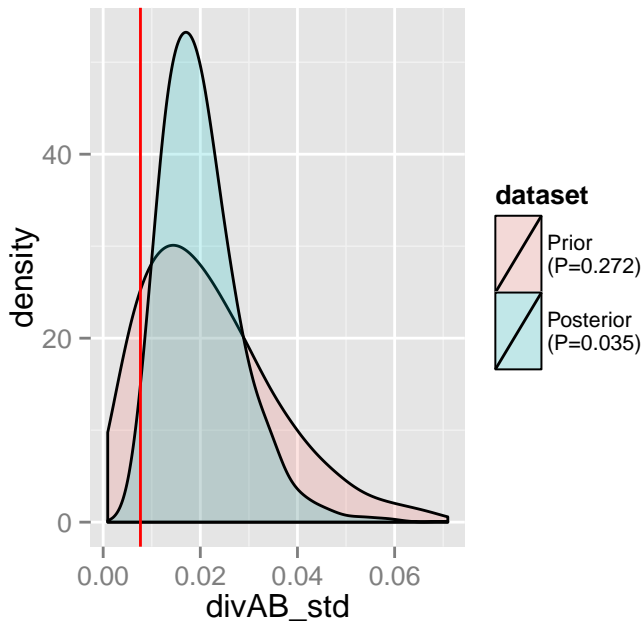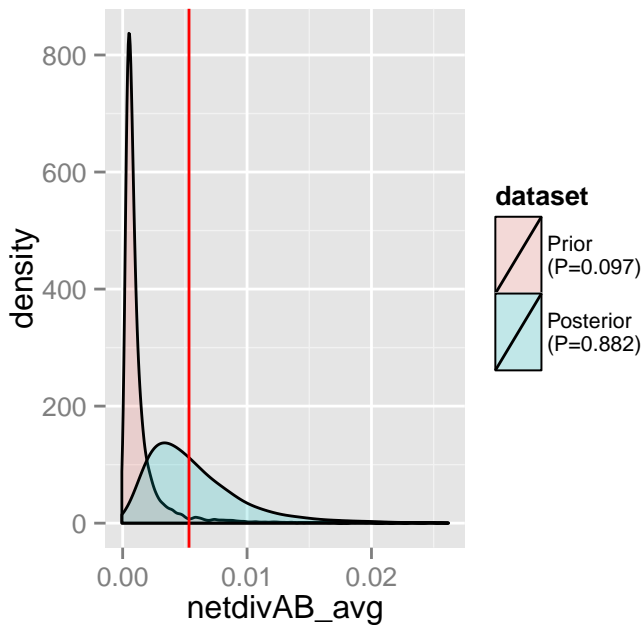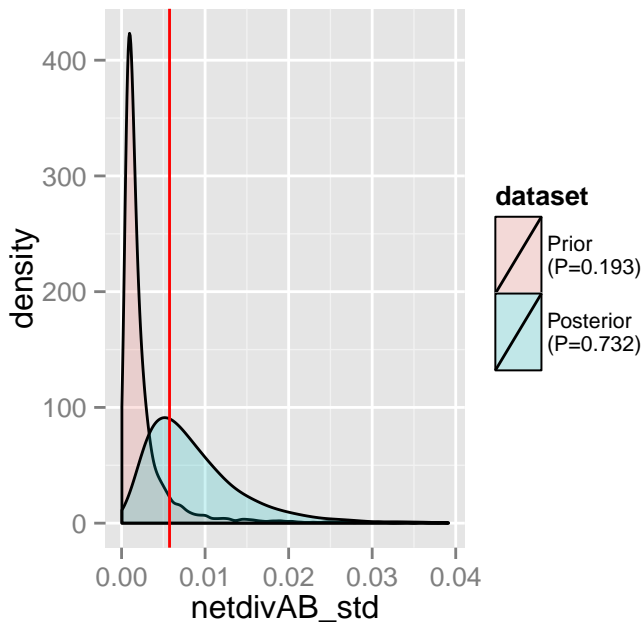



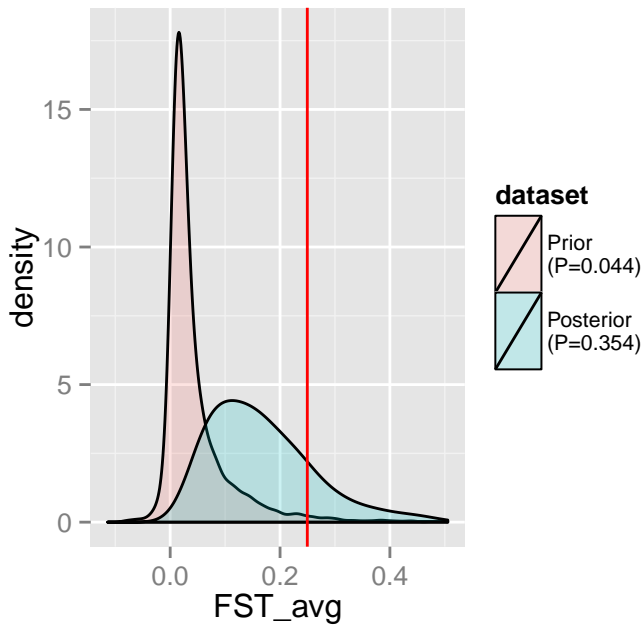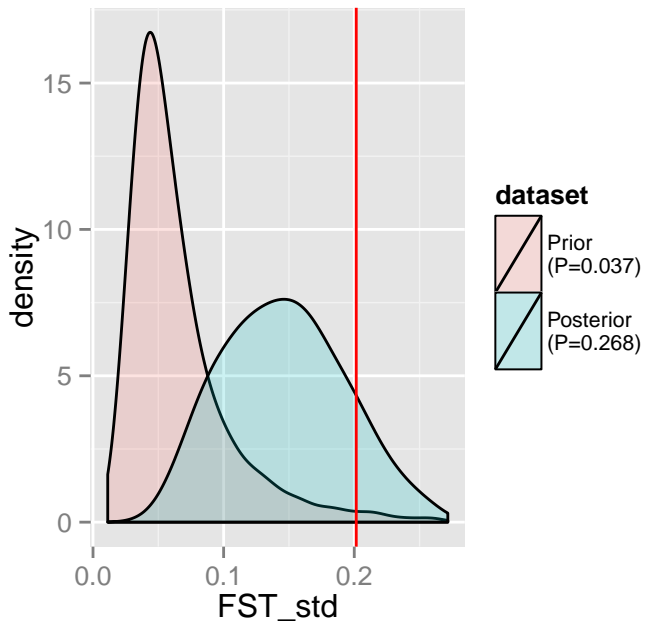

Supplement: hdy201672x4.pdf [file hdy201672x4.pdf]
